# Supplementary material
Source: PubMed Central journal article supplement (PMC4470809)
Supplement: NIHMS687884-supplement-401_2015_1436_MOESM1_ESM.pdf [file NIHMS687884-supplement-401_2015_1436_MOESM1_ESM.pdf]

# **Whole-genome sequencing reveals important role for *TBKI* and *OPTN* mutations in frontotemporal lobar degeneration without motor neuron disease**

Cyril Pottier<sup>1</sup>, Kevin F. Bieniek<sup>1,2</sup>, NiCole Finch<sup>1</sup>, Maartje van de Vorst<sup>3</sup>, Matt Baker<sup>1</sup>, Ralph Perkersen<sup>1</sup>, Patricia Brown<sup>1</sup>, Thomas Ravenscroft<sup>1</sup>, Marka van Blitterswijk<sup>1</sup>, Alexandra M. Nicholson<sup>1</sup>, Michael DeTure<sup>1</sup>, David S. Knopman<sup>4</sup>, Keith A. Josephs<sup>4</sup>, Joseph E. Parisi<sup>4</sup>, Ronald Petersen<sup>4</sup>, Kevin B. Boylan<sup>1</sup>, Bradley F. Boeve<sup>4</sup>, Neill R. Graff-Radford<sup>5</sup>, Joris A. Veltman<sup>3,6</sup>, Christian Gilissen<sup>3</sup>, Melissa Murray<sup>1</sup>, Dennis W. Dickson<sup>1</sup> and Rosa Rademakers<sup>1\*</sup>

<sup>1</sup>Department of Neuroscience, Mayo Clinic, Jacksonville, FL, USA

<sup>2</sup>Mayo Graduate School, Mayo Clinic, Rochester, MN, USA

<sup>3</sup>Department of Human Genetics, Radboud Institute for Molecular Life Sciences and Donders Centre for Neuroscience, Radboud University Medical Center, Nijmegen, the Netherlands

<sup>4</sup>Department of Neurology, Mayo Clinic, Rochester, MN, USA

<sup>5</sup>Department of Neurology, Mayo Clinic, Jacksonville, FL, USA

<sup>6</sup>Department of Clinical Genetics, Maastricht University Medical Centre, Maastricht, The Netherlands

## **\* Corresponding author:**

Rosa Rademakers, Ph.D.

Department of Neuroscience, Mayo Clinic, Jacksonville

4500 San Pablo Road, Jacksonville, FL 32224

Phone: (904) 953-6279

Fax: (904) 953-7370

E-mail: [Rademakers.rosa@mayo.edu](mailto:Rademakers.rosa@mayo.edu)

**Online Resource 1. Neurodegenerative disease genes selected for analysis.**

| <b>Gene name</b> | <b>Associated disease</b> |
|------------------|---------------------------|
| FUS              | ALS                       |
| TARDBP           | ALS                       |
| SOD1             | ALS                       |
| UBQLN2           | ALS                       |
| TUBA4A           | ALS                       |
| TBK1             | ALS                       |
| PFN1             | ALS                       |
| OPTN             | ALS                       |
| APP              | AD                        |
| PSEN1            | AD                        |
| PSEN2            | AD                        |
| PRNP             | CJD/AD                    |
| GRN              | FTLD                      |
| MAPT             | FTLD                      |
| SQSTM1           | FTLD                      |
| CHMP2B           | FTLD                      |
| VCP              | ALS                       |
| SNCA             | PD                        |
| LRRK2            | PD                        |
| VPS35            | PD                        |
| CSF1R            | POLD/HDLS                 |

ALS: amyotrophic lateral sclerosis, CJD: Creutzfeldt-Jakob disease, AD: Alzheimer's disease, FTLD: frontotemporal lobar degeneration, PD: Parkinson disease, POLD: Pigmented orthochromatic leukodystrophy, HDLS: hereditary diffuse leukoencephalopathy with axonal spheroids
